# Supplementary material for: Parkinson disease (PARK) genes are somatically mutated in cutaneous melanoma
Source: PubMed Central journal article supplement — Neurol Genet. 2016 Apr 13;2(3):e70. doi: 10.1212/NXG.0000000000000070 (PMC4832432; doi:10.1212/nxg.0000000000000070), 2016-04-13
Supplement: supp_2.3.e70_e-tables.pdf [file supp_2.3.e70_e-tables.pdf]

**Table e-1**

**Frequencies of combinations of *PARK* gene mutations in adenocarcinoma of lung (307 samples)**

| <i>PARK</i><br><i>gene</i> | <i>PA</i><br><i>RK</i><br>2 | <i>PA</i><br><i>RK</i><br>8 | <i>PA</i><br><i>RK</i><br>18 | <i>PA</i><br><i>RK</i><br>20 | <i>PA</i><br><i>RK</i><br>1/4 | <i>PA</i><br><i>RK</i><br>5 | <i>PA</i><br><i>RK</i><br>6 | <i>PA</i><br><i>RK</i><br>7 | <i>PA</i><br><i>RK</i><br>9 | <i>PA</i><br><i>RK</i><br>11 | <i>PA</i><br><i>RK</i><br>13 | <i>PA</i><br><i>RK</i><br>14 | <i>PA</i><br><i>RK</i><br>15 | <i>PA</i><br><i>RK</i><br>17 |
|----------------------------|-----------------------------|-----------------------------|------------------------------|------------------------------|-------------------------------|-----------------------------|-----------------------------|-----------------------------|-----------------------------|------------------------------|------------------------------|------------------------------|------------------------------|------------------------------|
| <b><i>PARK2</i></b>        |                             |                             |                              |                              |                               |                             |                             |                             |                             |                              |                              |                              |                              |                              |
| <b><i>PARK8</i></b>        | 3                           |                             |                              |                              |                               |                             |                             |                             |                             |                              |                              |                              |                              |                              |
| <b><i>PARK18</i></b>       | 1                           | 1                           |                              |                              |                               |                             |                             |                             |                             |                              |                              |                              |                              |                              |
| <b><i>PARK20</i></b>       |                             |                             |                              |                              |                               |                             |                             |                             |                             |                              |                              |                              |                              |                              |
| <b><i>PARK1/4</i></b>      |                             | 1                           |                              |                              |                               |                             |                             |                             |                             |                              |                              |                              |                              |                              |
| <b><i>PARK5</i></b>        |                             |                             |                              |                              |                               |                             |                             |                             |                             |                              |                              |                              |                              |                              |
| <b><i>PARK6</i></b>        |                             |                             |                              |                              |                               |                             |                             |                             |                             |                              |                              |                              |                              |                              |
| <b><i>PARK7</i></b>        |                             |                             |                              |                              |                               |                             |                             |                             |                             |                              |                              |                              |                              |                              |
| <b><i>PARK9</i></b>        |                             | 1                           |                              | 1                            |                               |                             |                             |                             |                             |                              |                              |                              |                              |                              |
| <b><i>PARK11</i></b>       | 1                           | 2                           |                              |                              |                               | 1                           |                             |                             |                             |                              |                              |                              |                              |                              |
| <b><i>PARK13</i></b>       | 1                           |                             |                              |                              |                               |                             |                             |                             |                             |                              |                              |                              |                              |                              |
| <b><i>PARK14</i></b>       | 1                           | 1                           | 1                            |                              |                               |                             |                             |                             |                             |                              |                              |                              |                              |                              |
| <b><i>PARK15</i></b>       |                             |                             |                              |                              |                               |                             |                             |                             |                             |                              |                              |                              |                              |                              |
| <b><i>PARK17</i></b>       |                             |                             |                              |                              |                               |                             |                             |                             | 1                           |                              |                              |                              |                              |                              |
| <b><i>PARK19</i></b>       | 1                           | 1                           | 1                            |                              |                               |                             |                             |                             | 1                           |                              | 1                            |                              | 1                            |                              |

Table e-2

Frequencies of combinations of *PARK* gene mutations in squamous cell carcinoma of lung (177 samples)

| <i>PARK</i><br><i>gene</i> | <i>PA</i><br><i>RK</i><br>2 | <i>PA</i><br><i>RK</i><br>8 | <i>PA</i><br><i>RK</i><br>18 | <i>PA</i><br><i>RK</i><br>20 | <i>PA</i><br><i>RK</i><br>1/4 | <i>PA</i><br><i>RK</i><br>5 | <i>PA</i><br><i>RK</i><br>6 | <i>PA</i><br><i>RK</i><br>7 | <i>PA</i><br><i>RK</i><br>9 | <i>PA</i><br><i>RK</i><br>11 | <i>PA</i><br><i>RK</i><br>13 | <i>PA</i><br><i>RK</i><br>14 | <i>PA</i><br><i>RK</i><br>15 | <i>PA</i><br><i>RK</i><br>17 |
|----------------------------|-----------------------------|-----------------------------|------------------------------|------------------------------|-------------------------------|-----------------------------|-----------------------------|-----------------------------|-----------------------------|------------------------------|------------------------------|------------------------------|------------------------------|------------------------------|
| <b><i>PARK2</i></b>        |                             |                             |                              |                              |                               |                             |                             |                             |                             |                              |                              |                              |                              |                              |
| <b><i>PARK8</i></b>        |                             |                             |                              |                              |                               |                             |                             |                             |                             |                              |                              |                              |                              |                              |
| <b><i>PARK18</i></b>       | 2                           |                             |                              |                              |                               |                             |                             |                             |                             |                              |                              |                              |                              |                              |
| <b><i>PARK20</i></b>       |                             |                             | 1                            |                              |                               |                             |                             |                             |                             |                              |                              |                              |                              |                              |
| <b><i>PARK1/4</i></b>      |                             |                             |                              |                              |                               |                             |                             |                             |                             |                              |                              |                              |                              |                              |
| <b><i>PARK5</i></b>        |                             |                             |                              |                              |                               |                             |                             |                             |                             |                              |                              |                              |                              |                              |
| <b><i>PARK6</i></b>        | 1                           | 1                           |                              | 1                            |                               |                             |                             |                             |                             |                              |                              |                              |                              |                              |
| <b><i>PARK7</i></b>        |                             |                             |                              |                              |                               |                             |                             |                             |                             |                              |                              |                              |                              |                              |
| <b><i>PARK9</i></b>        | 1                           |                             |                              |                              |                               |                             |                             |                             |                             |                              |                              |                              |                              |                              |
| <b><i>PARK11</i></b>       |                             |                             |                              |                              |                               |                             |                             |                             |                             |                              |                              |                              |                              |                              |
| <b><i>PARK13</i></b>       |                             | 1                           |                              |                              |                               |                             |                             |                             |                             |                              |                              |                              |                              |                              |
| <b><i>PARK14</i></b>       | 1                           |                             |                              | 1                            |                               |                             | 1                           |                             |                             | 1                            |                              |                              |                              |                              |
| <b><i>PARK15</i></b>       | 1                           | 1                           |                              | 1                            |                               |                             | 1                           |                             |                             |                              |                              | 2                            |                              |                              |
| <b><i>PARK17</i></b>       |                             |                             | 1                            |                              |                               |                             |                             |                             |                             |                              |                              |                              |                              |                              |
| <b><i>PARK19</i></b>       |                             | 1                           |                              |                              |                               |                             |                             |                             |                             |                              |                              | 1                            |                              | 1                            |

The first row and first column depict the 15 *PARK* genes, while the cells represent the joint frequencies (number of samples with these mutations). The first 4 rows (and columns) depict the 4 most frequently mutated *PARK* genes.
